# Supplementary material for: VCAN Hypomethylation and Expression as Predictive Biomarkers of Drug Sensitivity in Upper Urinary Tract Urothelial Carcinoma
Source: MDPI journal article supplement (doi:10.3390/ijms24087486), 2023-04-19
Supplement: s1 [file s1]

# Supplementary Figure S1

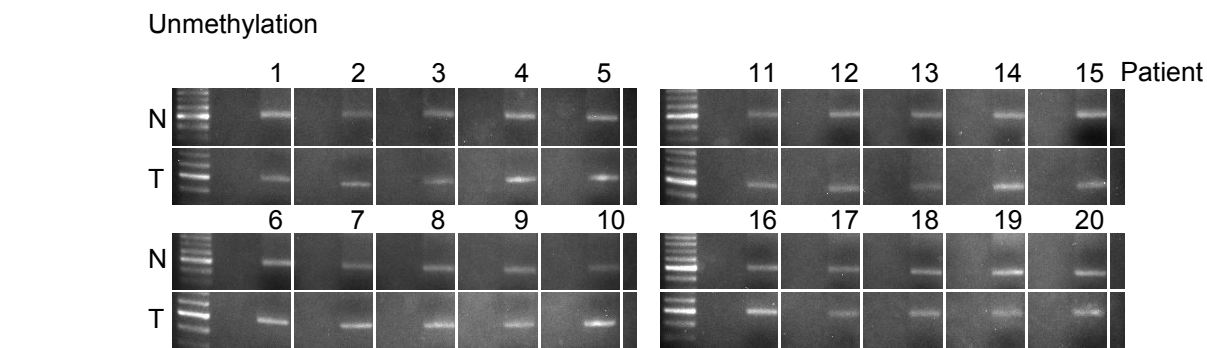

**Supplementary Figure S1.** DNA agarose gel analysis was performed to quantify the unmethylation in site 4 of VCAN gene from N/T pairs of UTUC.
